# Supplementary material for: Self photostabilizing UV-durable MWCNT/polymer nanocomposites
Source: Royal Society of Chemistry journal article supplement (doi:10.1039/c2ra21583g), 2012-01-01
Supplement: c2ra21583g.pdf [file c2ra21583g.pdf]

## Supporting information

### Self photostabilizing UV-durable MWCNT/polymer nanocomposites

Sunil P. Lonkar<sup>a\*†</sup>, Omkar S. Kushwaha<sup>b</sup>, Andreas Leuteritz<sup>a</sup>, Gert Heinrich<sup>a,c</sup>,  
Rajpal Singh<sup>b</sup>

<sup>a</sup>Leibniz-Institut für Polymerforschung Dresden e.V., Hohe Strasse 6, Dresden 01069, Germany.

<sup>b</sup>PSE Division, National Chemical Laboratory, Pune-411008, India

<sup>c</sup>Technische Universität Dresden, Institut für Werkstoffwissenschaft, Helmholtzstrasse 7, 01069  
Dresden, Germany

\*Corresponding author: lonkars@gmail.com, Sunil.Lonkar@umons.ac.be

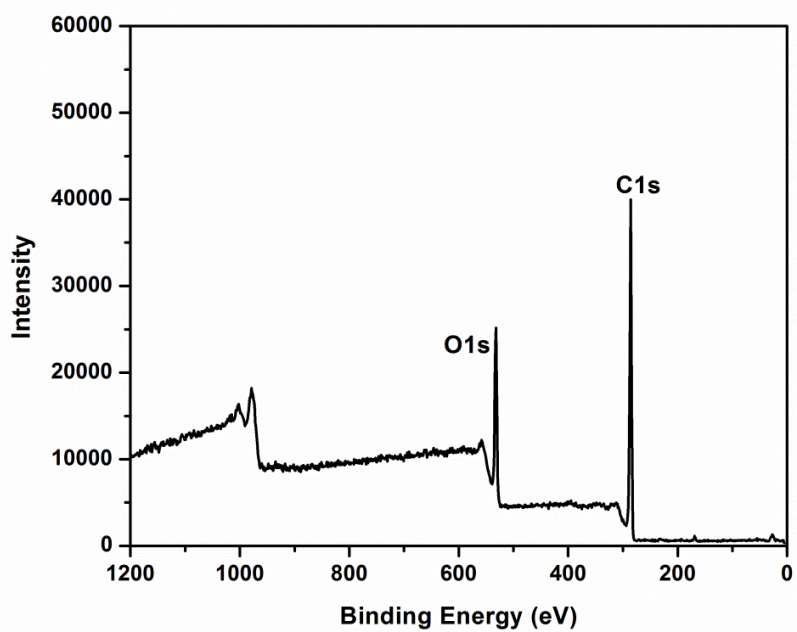

**Fig.S1.** XPS survey scan spectra of MWCNTs -COOH

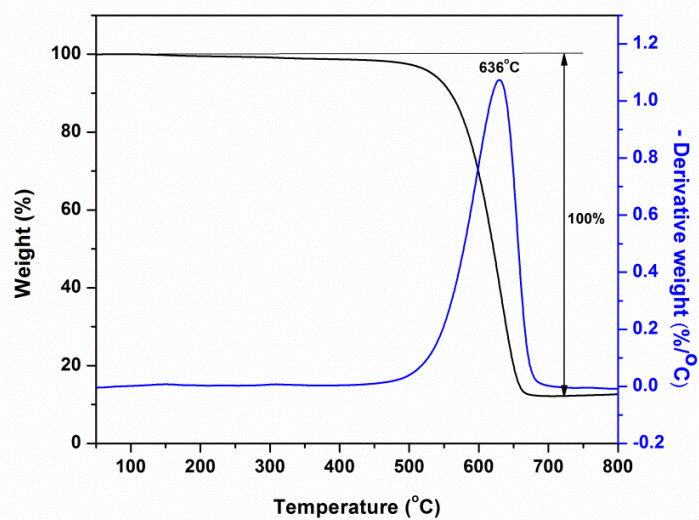

**Fig.S2.** TGA/DTA curves of MWCNTs

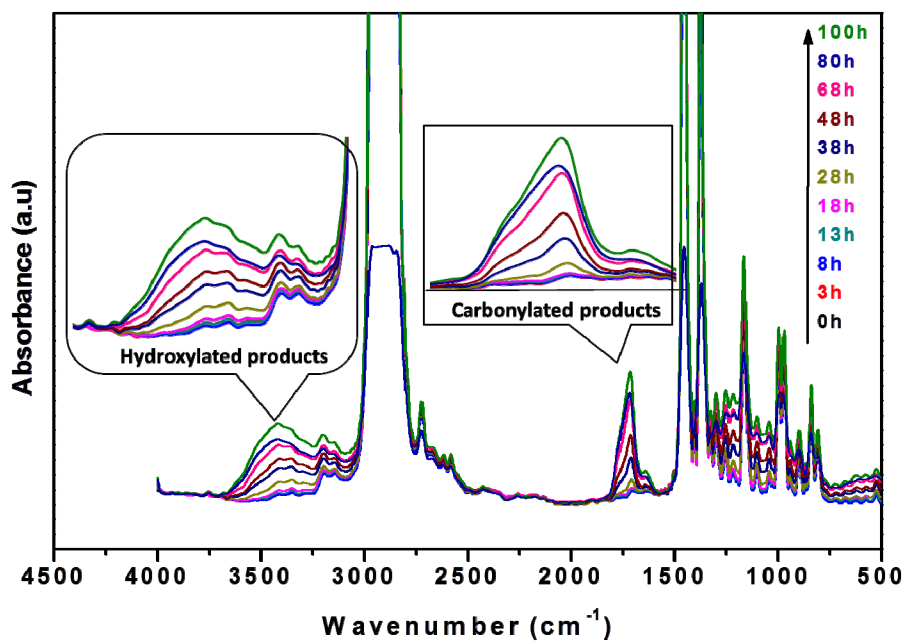

Fig.S3. FTIR spectra of pure films of photooxidized at  $\lambda > 300$  nm at 60 °C

Table.S1. XPS Data

| Samples                | C 1s (%) | O 1s (%) | N 1s (%) | $n_o/n_c$ |
|------------------------|----------|----------|----------|-----------|
| Pristine MWCNTs        | 98.78    | 1.22     | 0        | 0.01      |
| MWCNTs-COOH            | 86.88    | 13.12    | 0        | 0.15      |
| MWCNTs- <i>f</i> -HALS | 89.95    | 6.77     | 3.28     | 0.07      |
